# Supplementary material for: Time dependent genetic analysis links field and controlled environment phenotypes in the model C4 grass Setaria
Source: PubMed Central journal article supplement (PMC5507400; doi:10.1371/journal.pgen.1006841), 2017-06-23

DN13

Dense

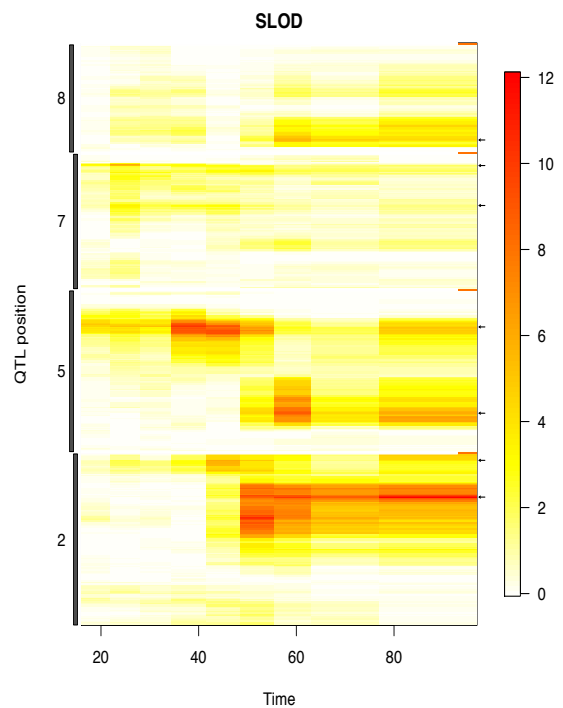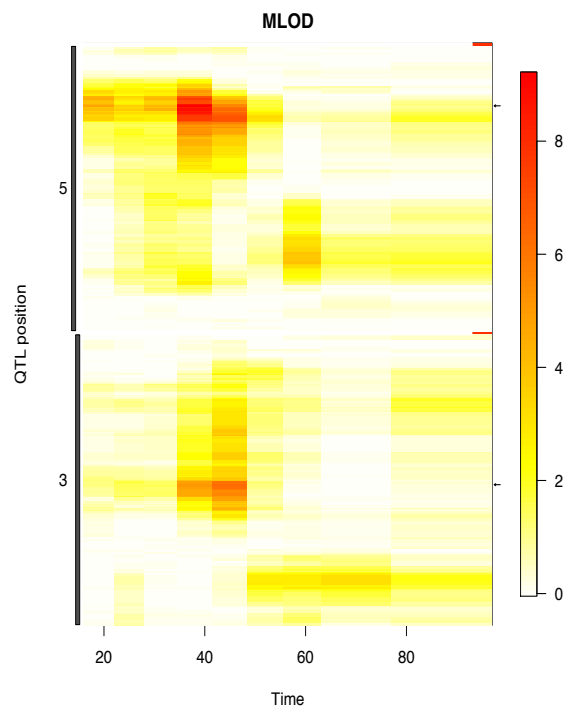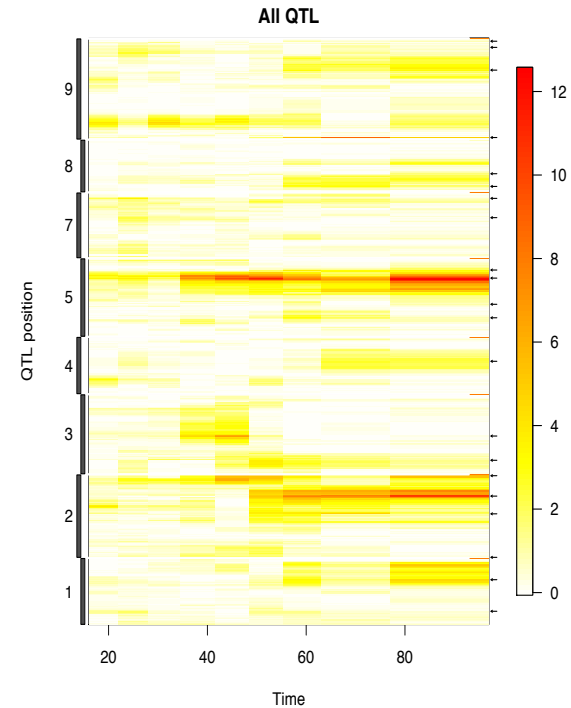

Sparse

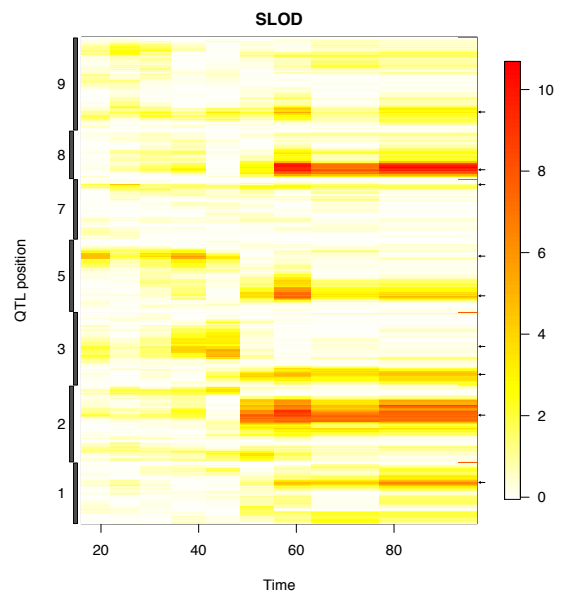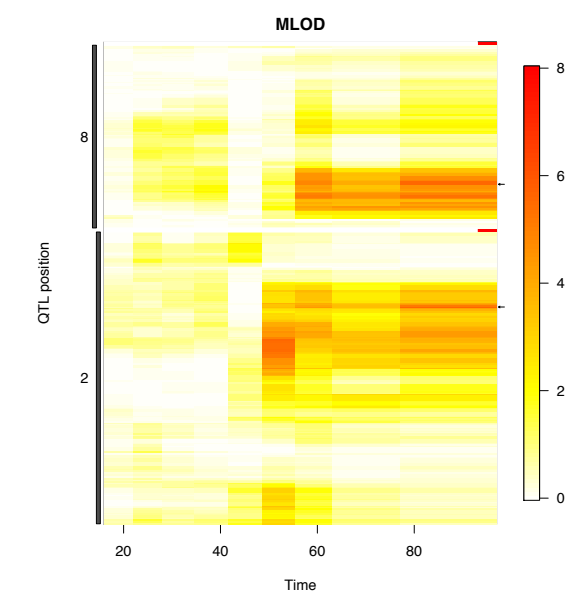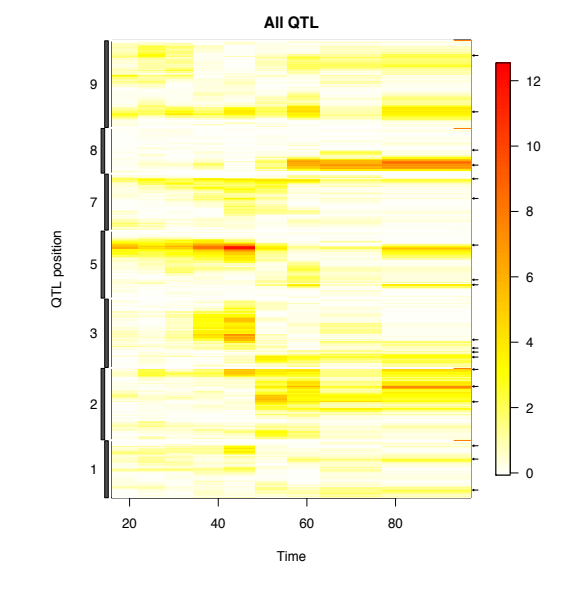

DN14

Dense

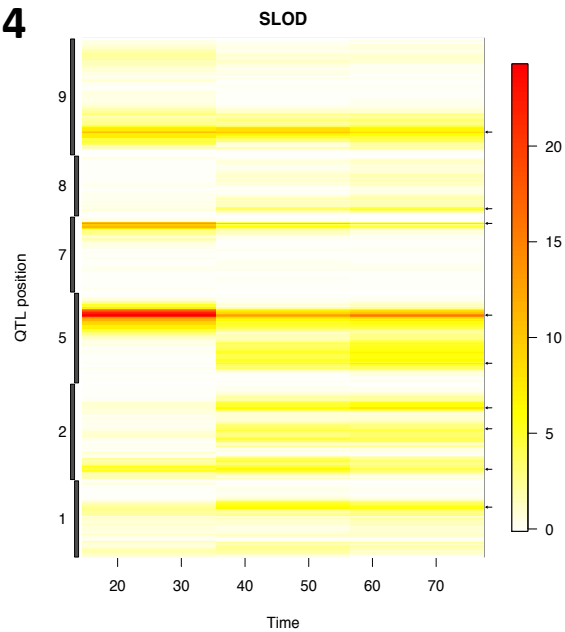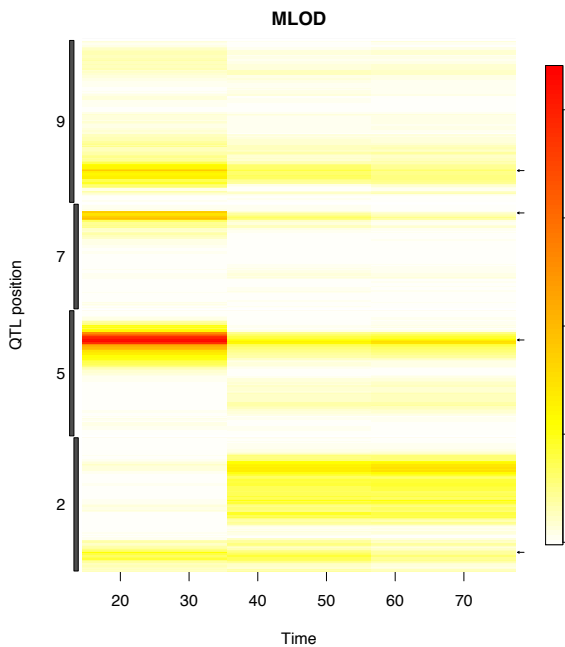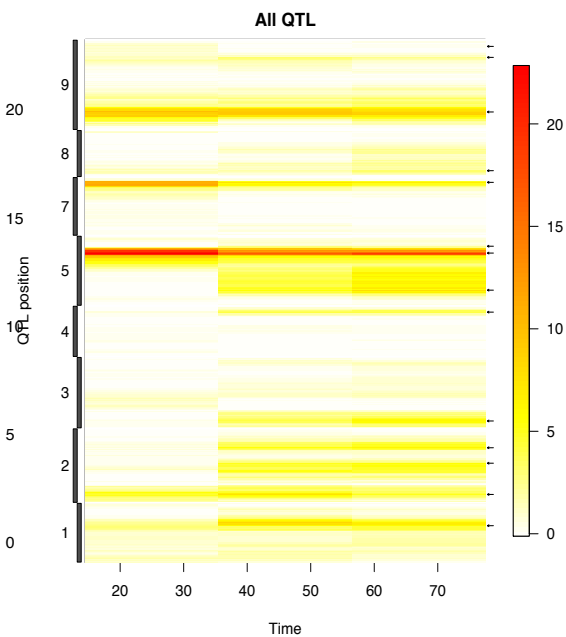

Sparse

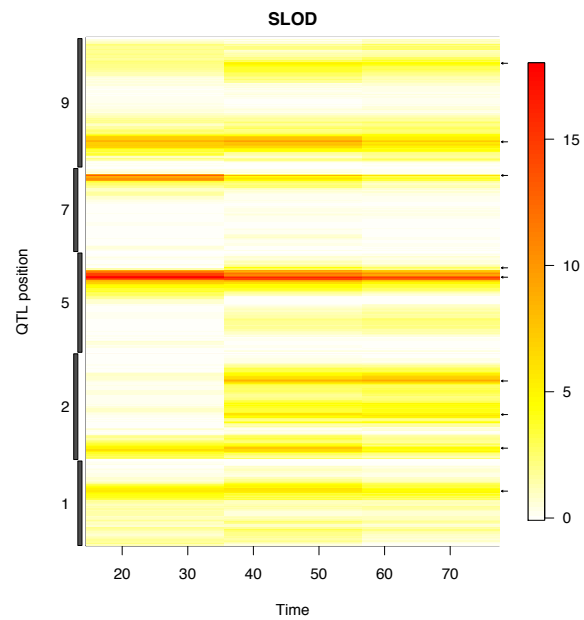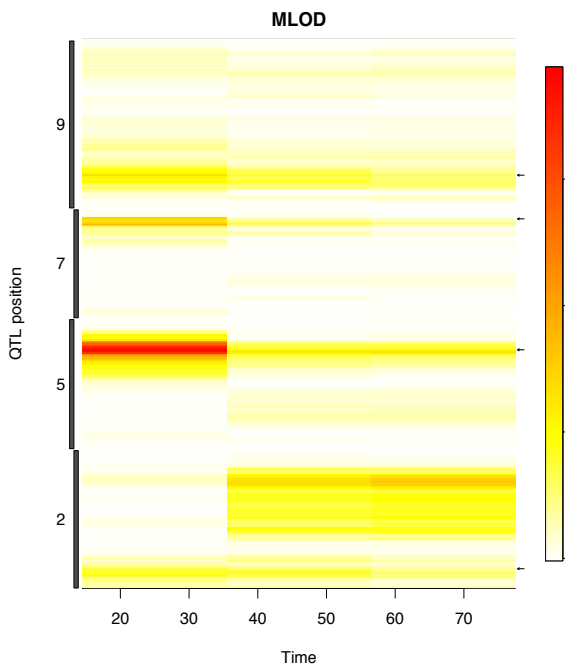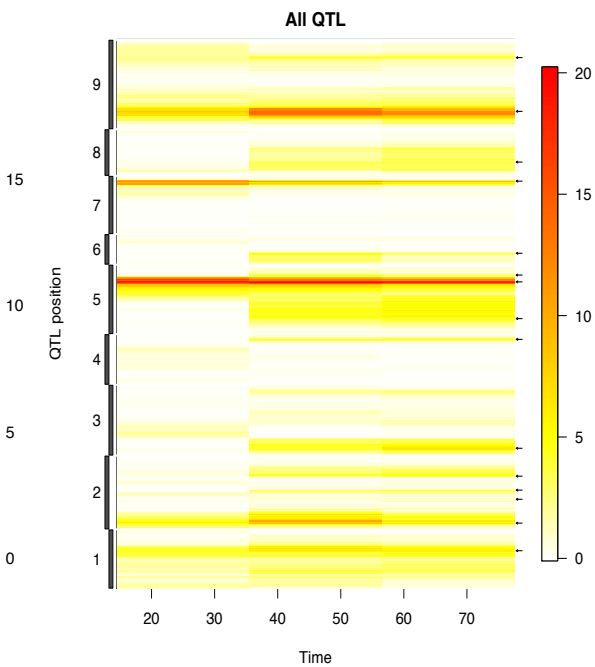

**DR13**

**Dry**

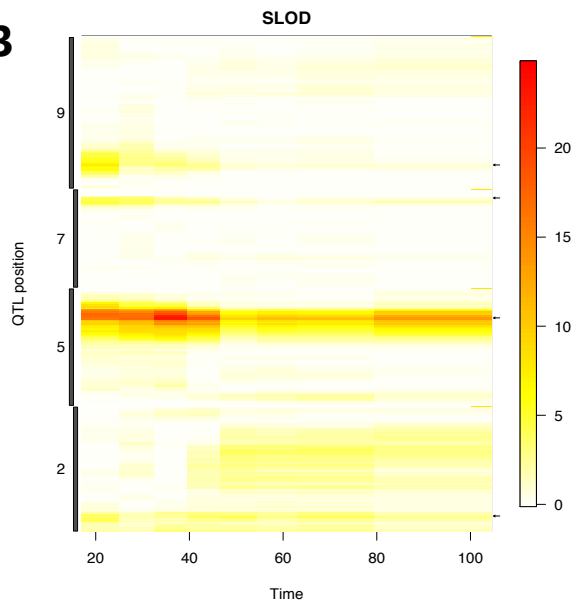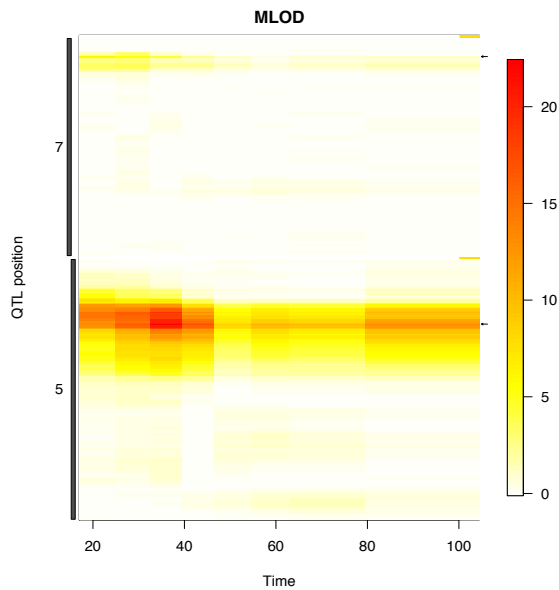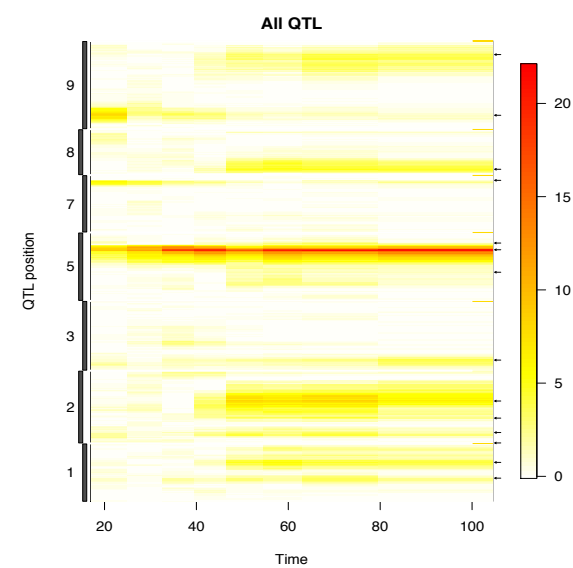

**Wet**

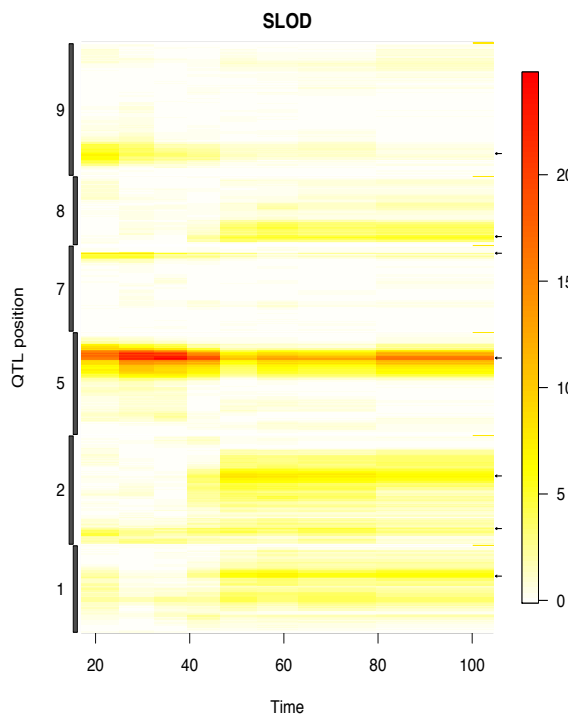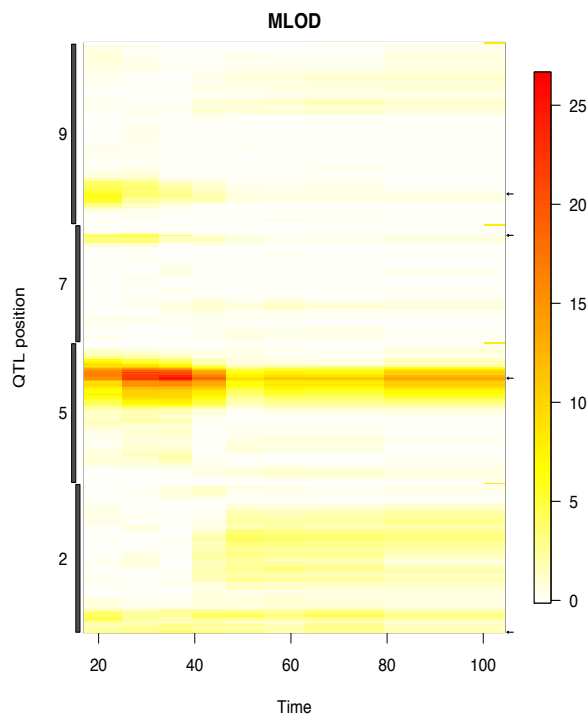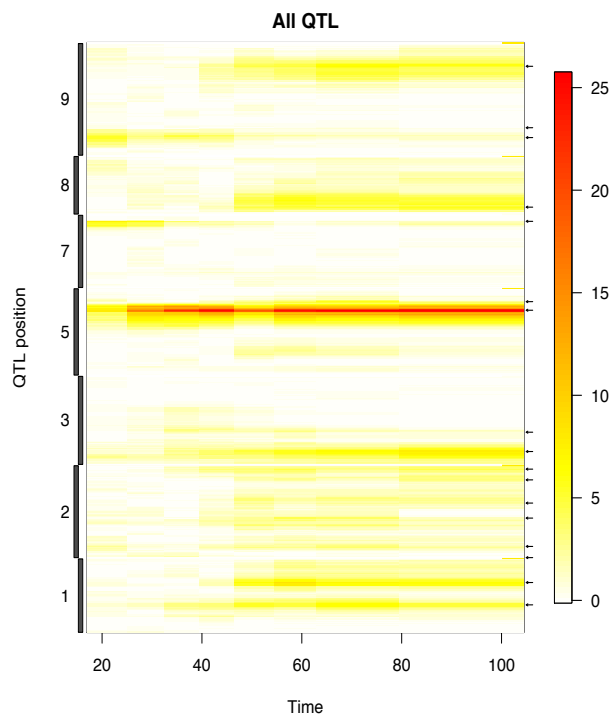

**DR14**

**SLOD**

**MLOD**

**All QTL**

**Dry**

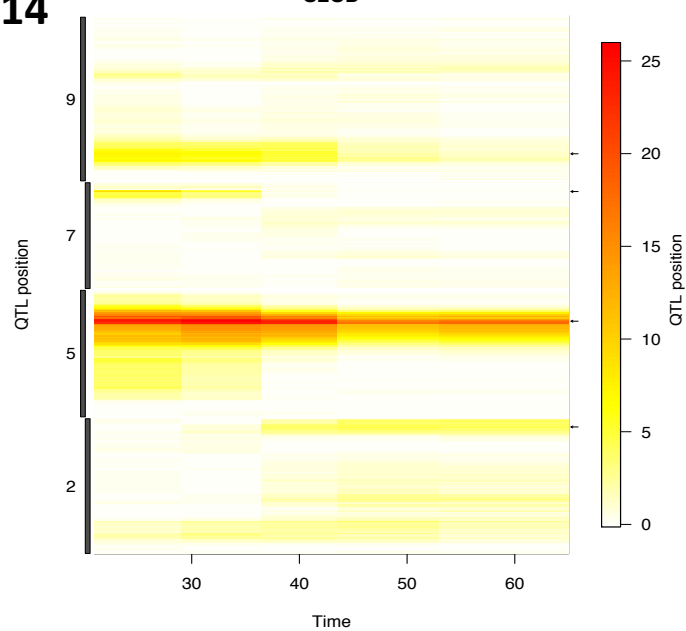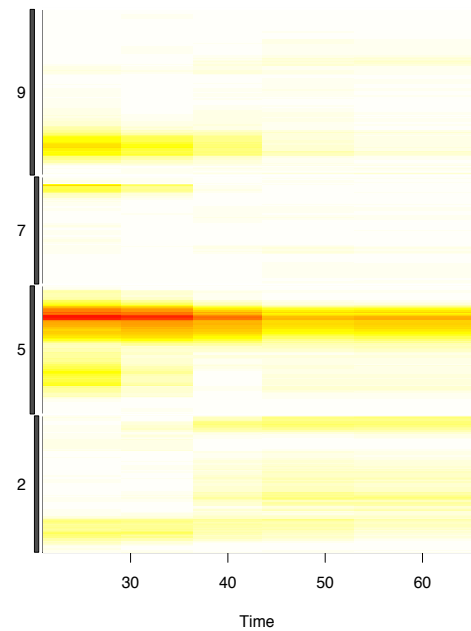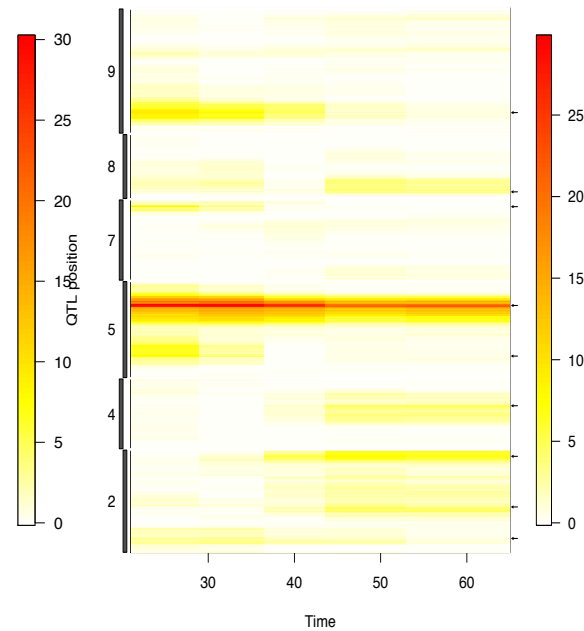

**SLOD**

**MLOD**

**All QTL**

**Wet**

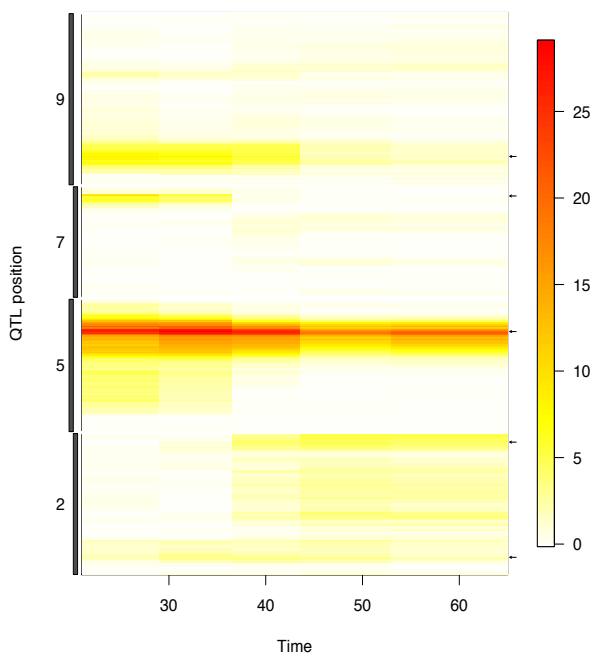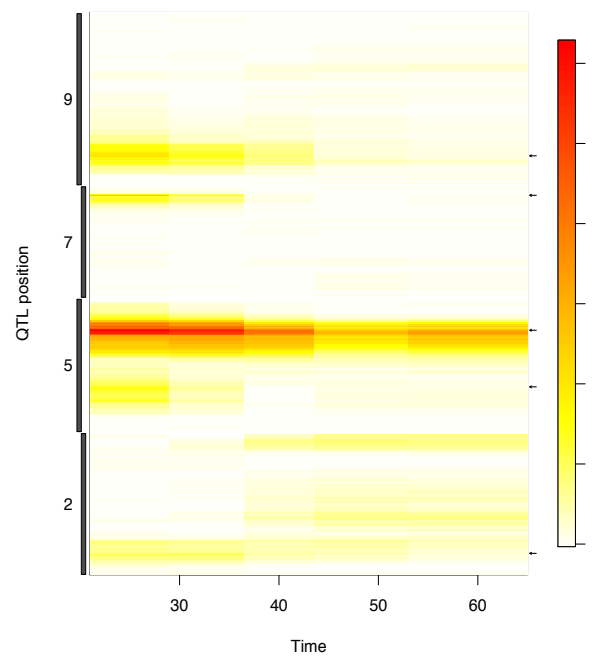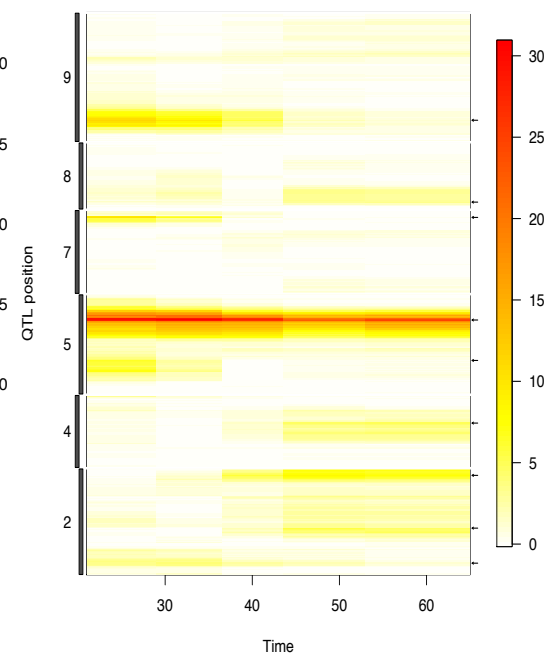

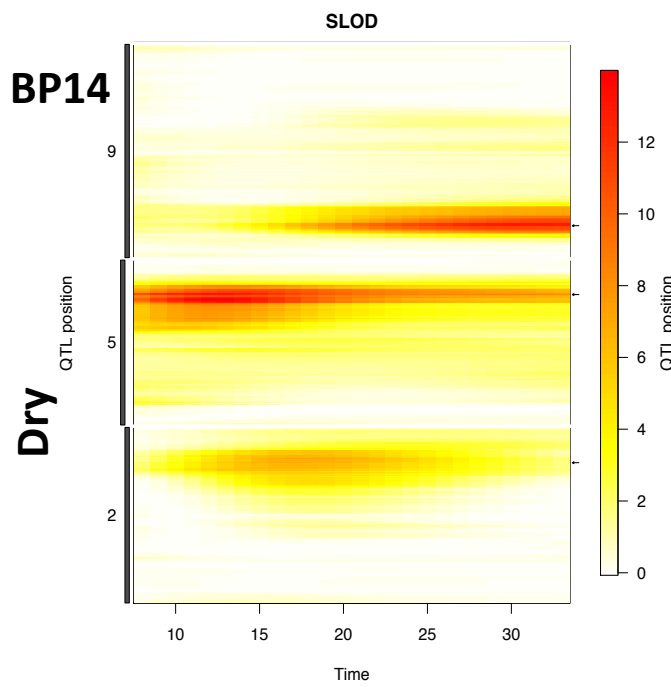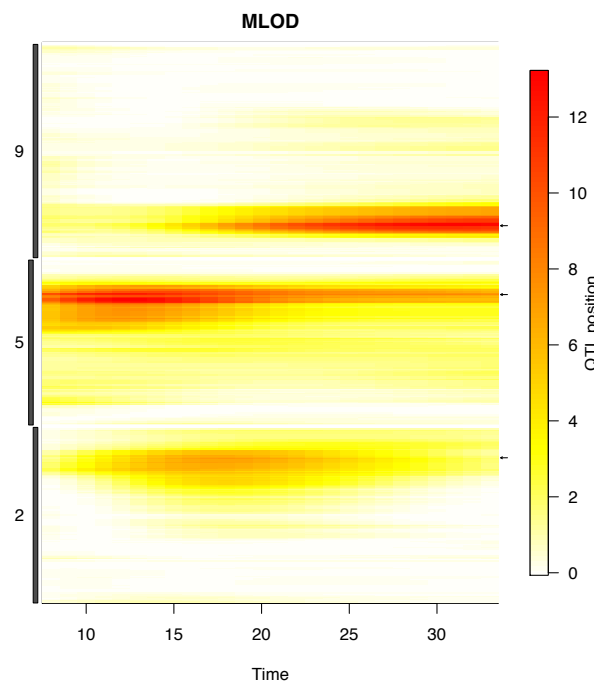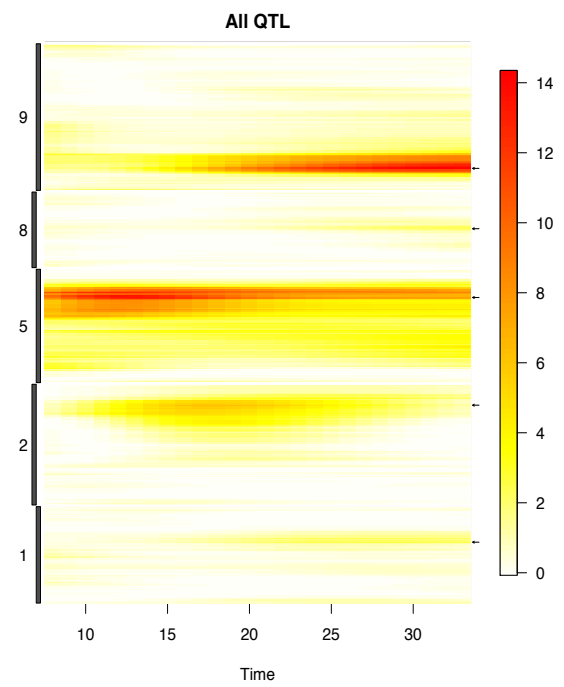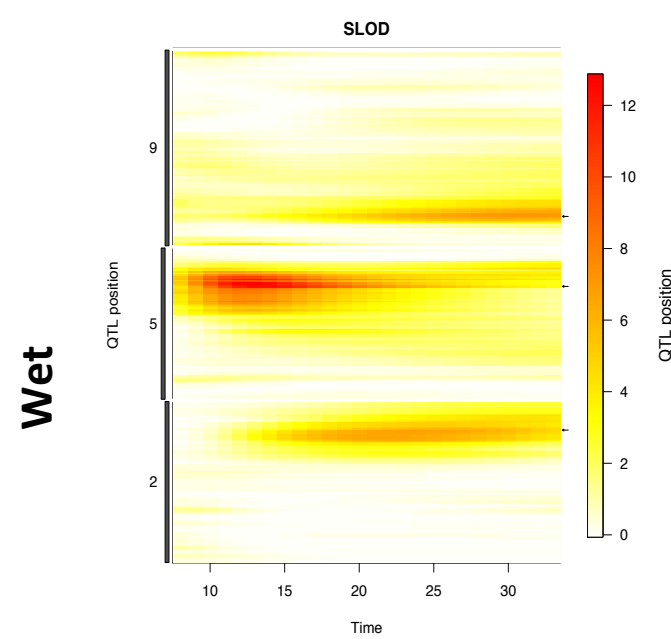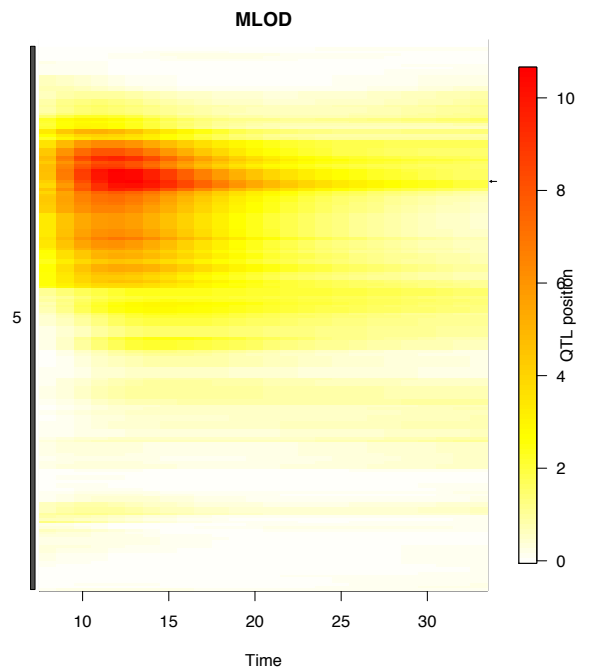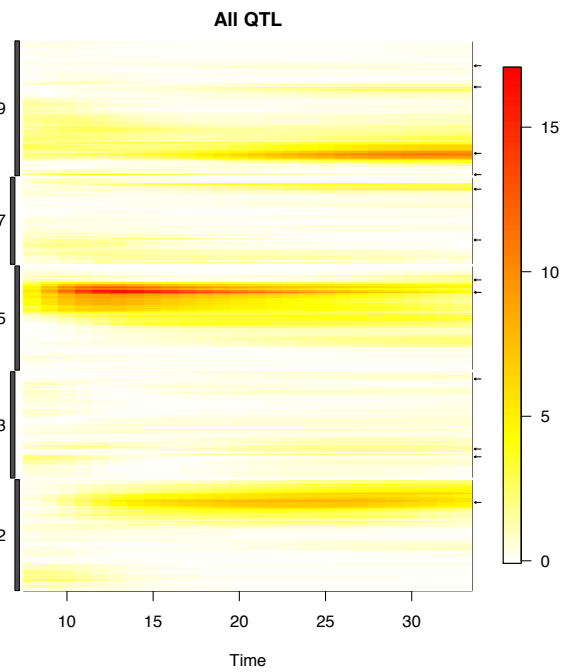

Supplement: pgen.1006841.s009.pdf [file pgen.1006841.s009.pdf]
