# Supplementary material for: Time dependent genetic analysis links field and controlled environment phenotypes in the model C4 grass Setaria
Source: PubMed Central journal article supplement (PMC5507400; doi:10.1371/journal.pgen.1006841), 2017-06-23

## H2 (mean)

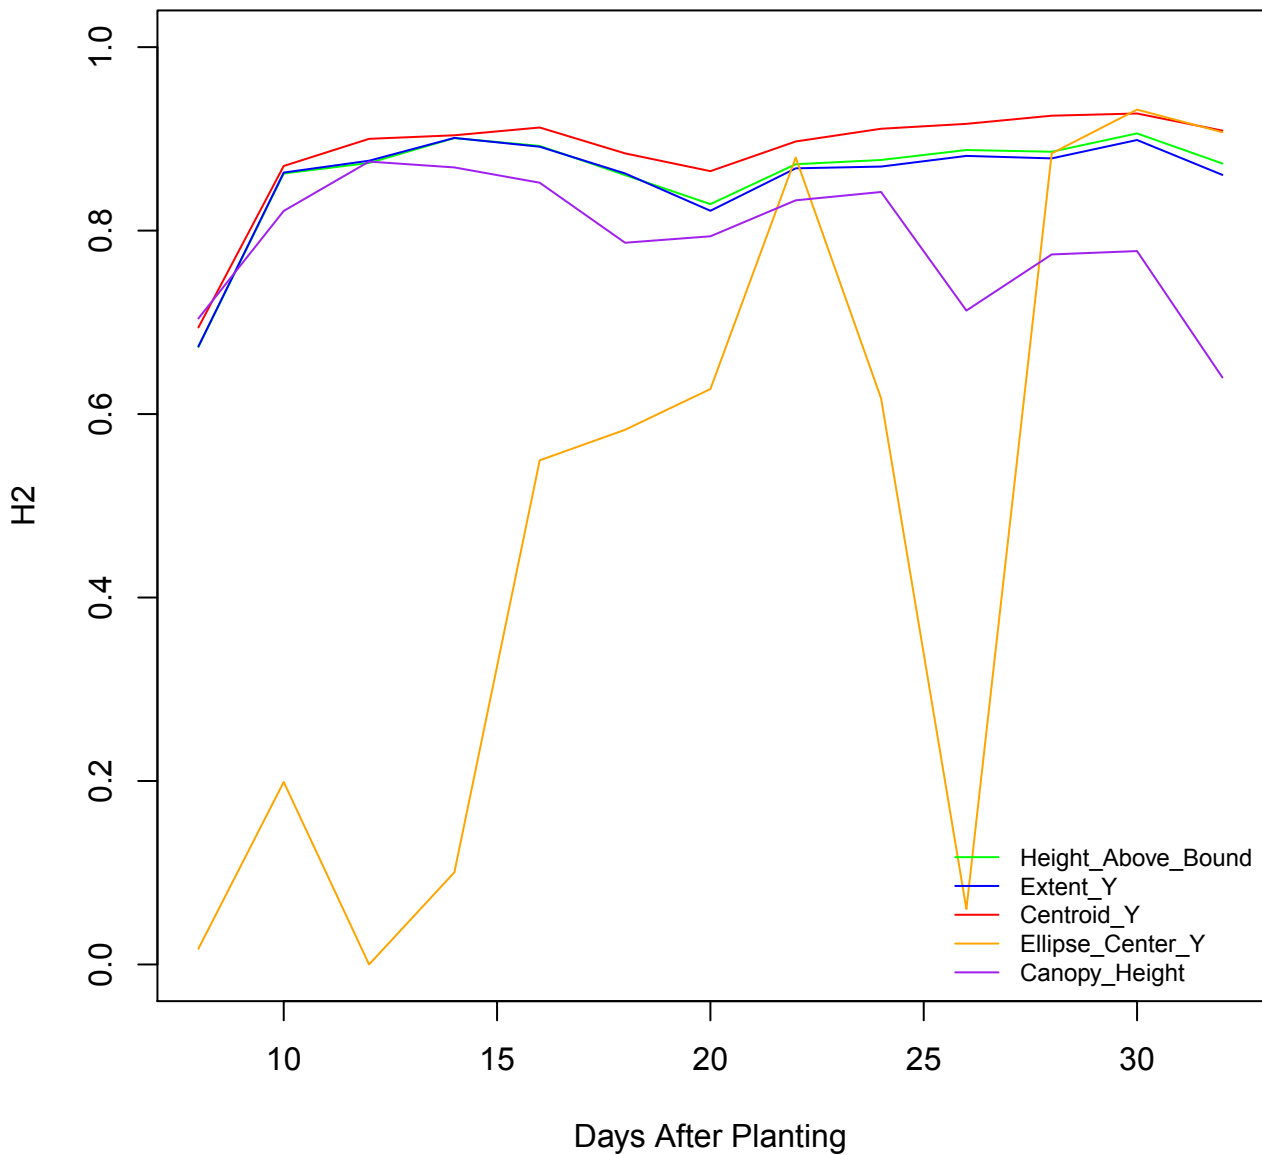

## Treatment (mean)

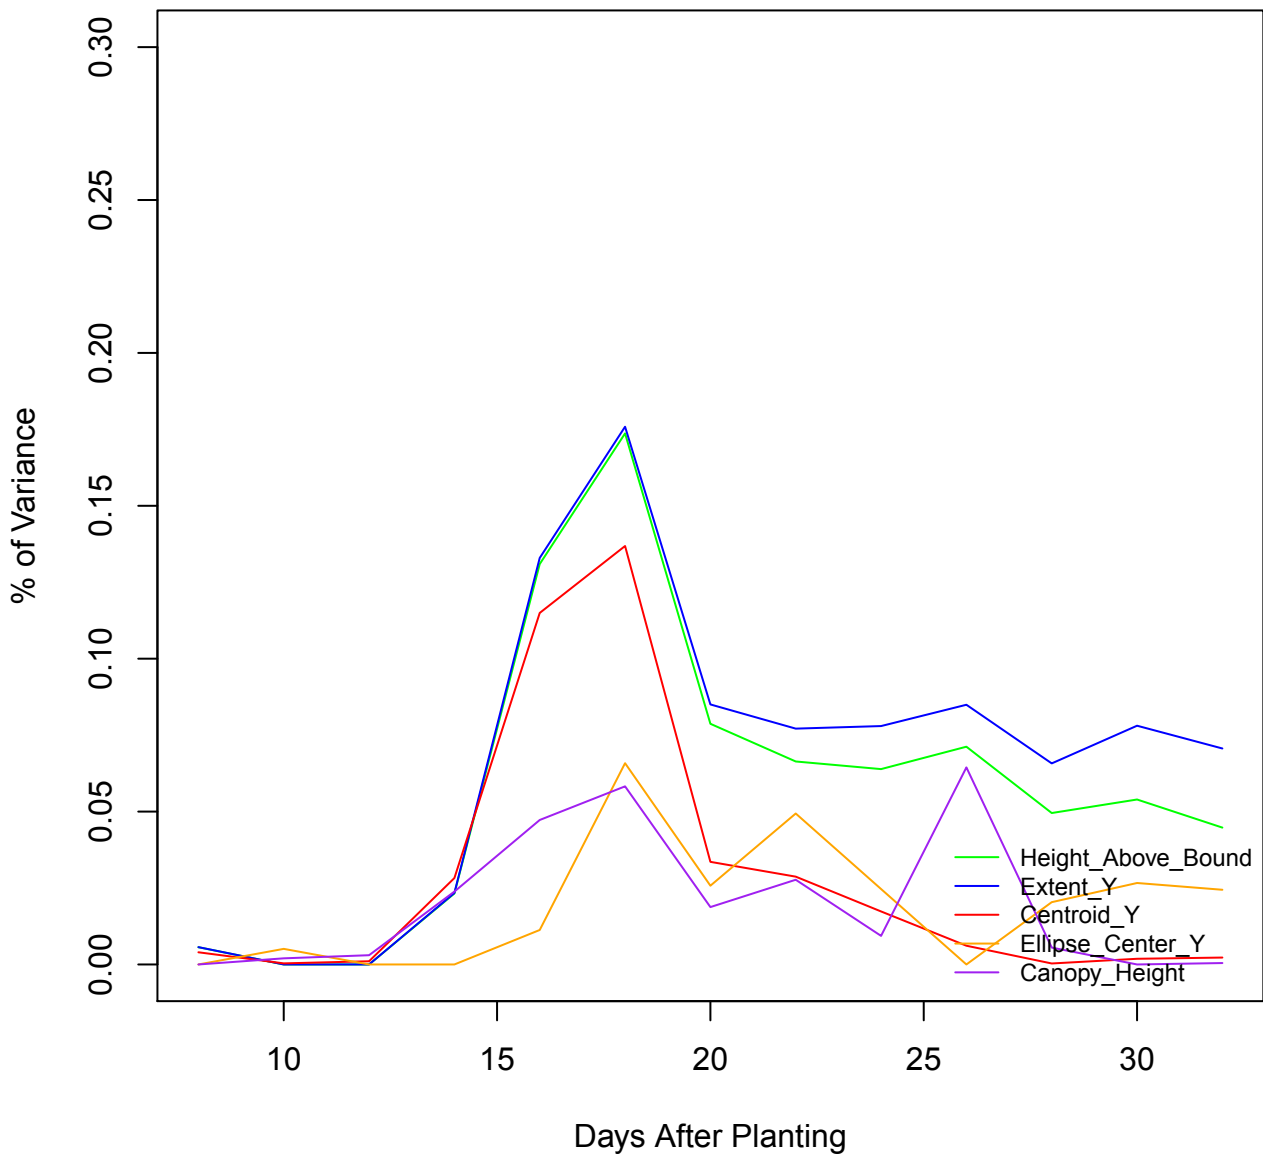

## G X Treatment (mean)

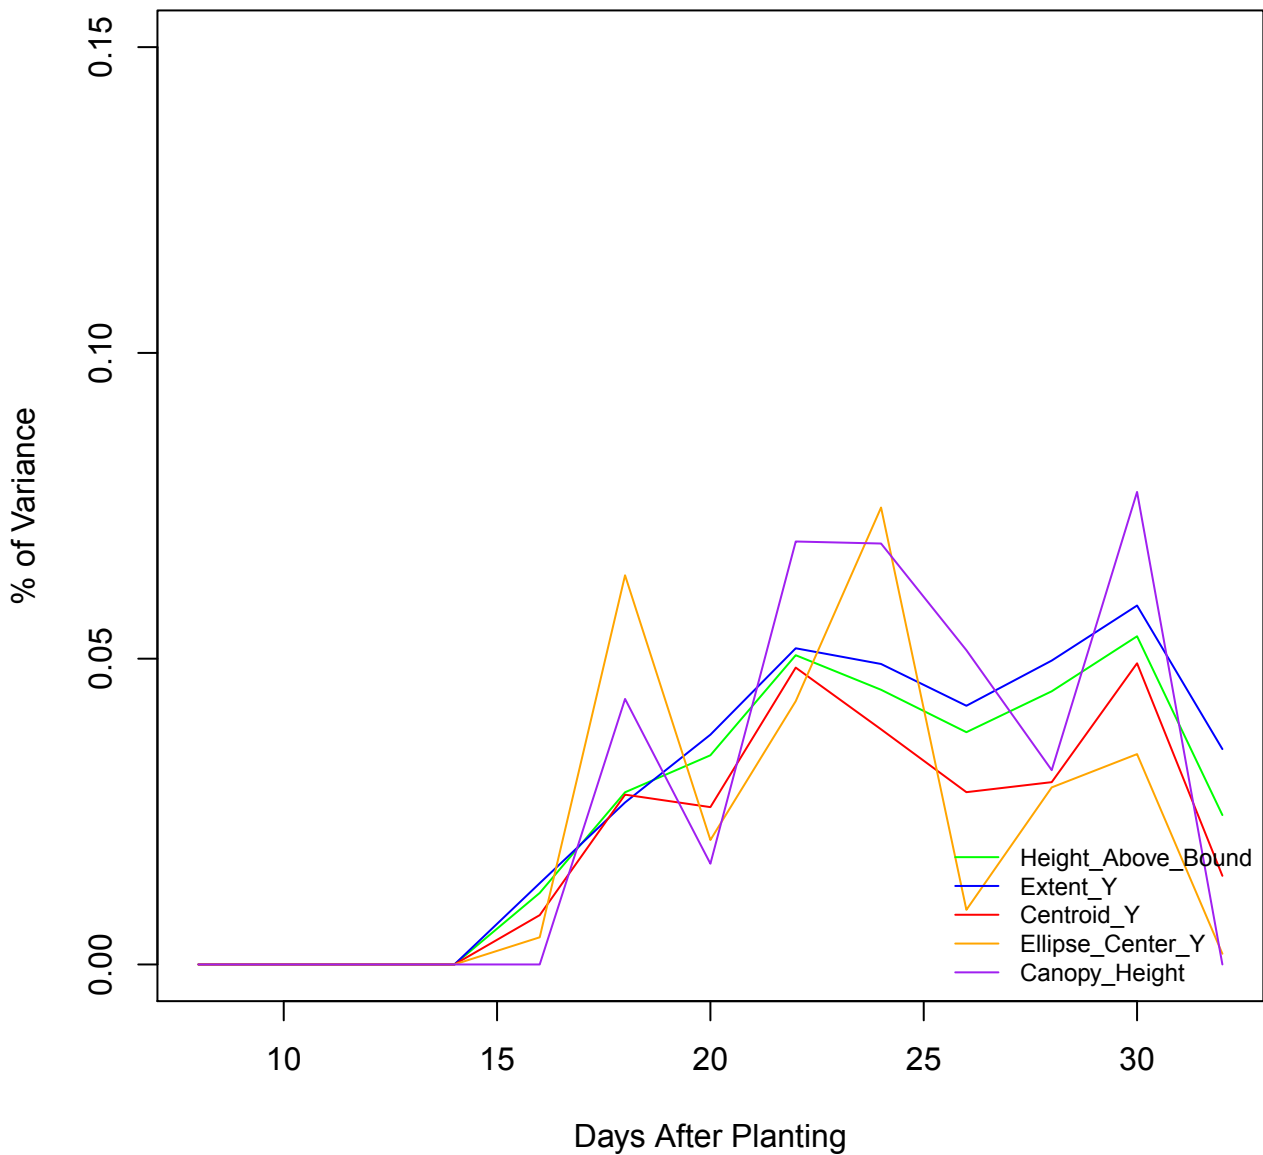

Supplement: pgen.1006841.s002.pdf [file pgen.1006841.s002.pdf]
