# Supplementary material for: Time dependent genetic analysis links field and controlled environment phenotypes in the model C4 grass Setaria
Source: PubMed Central journal article supplement (PMC5507400; doi:10.1371/journal.pgen.1006841), 2017-06-23

S7a\_Fig

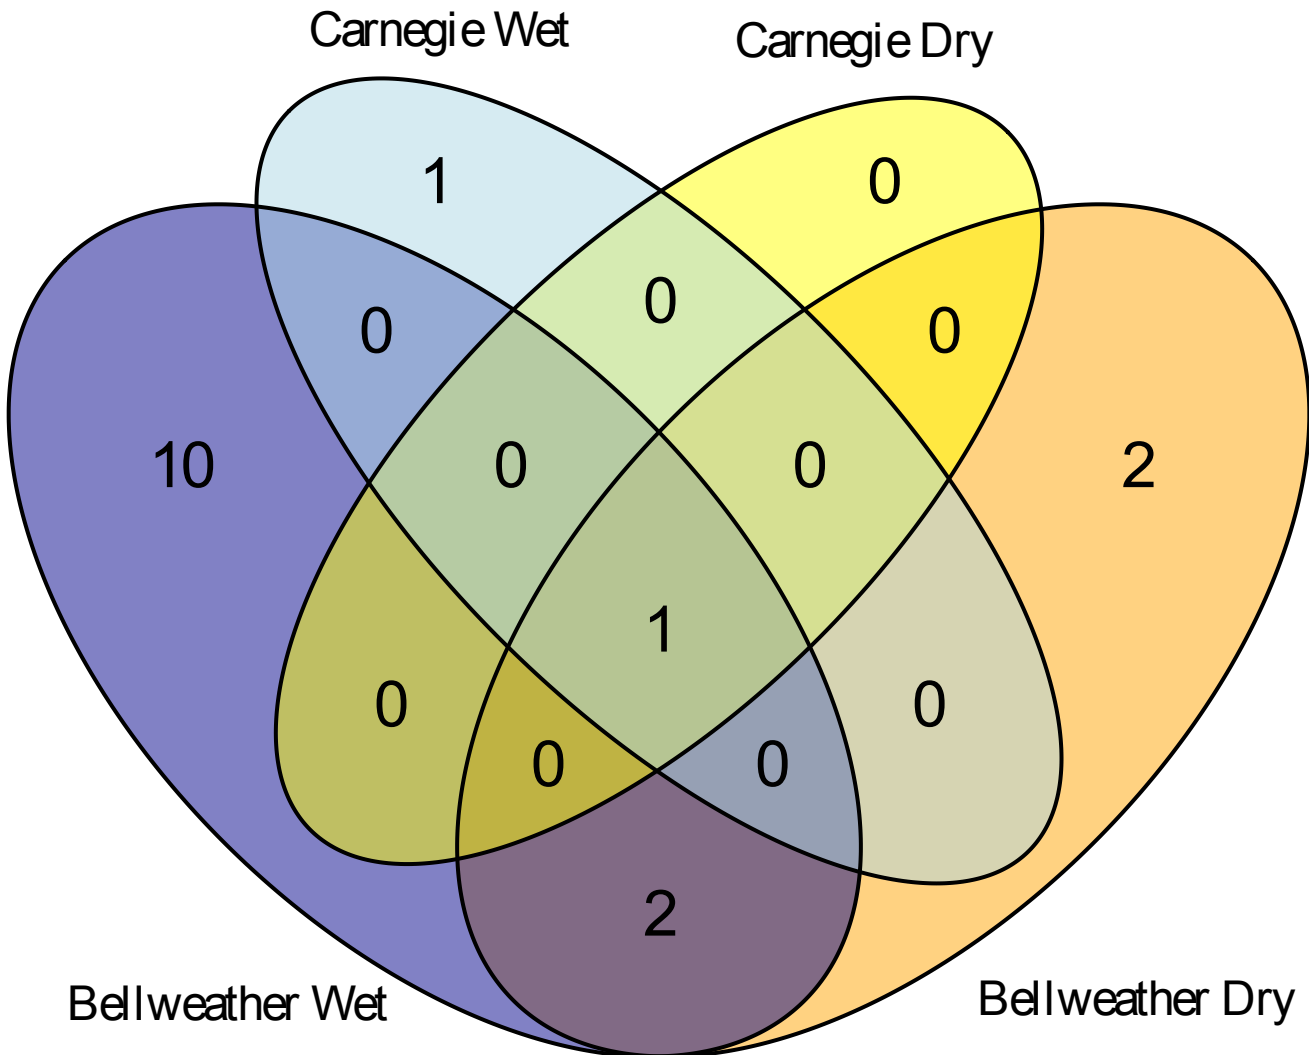

S7b\_Fig

BP14 Wet

DL13 Wet

DR13 Wet

DR14 Wet

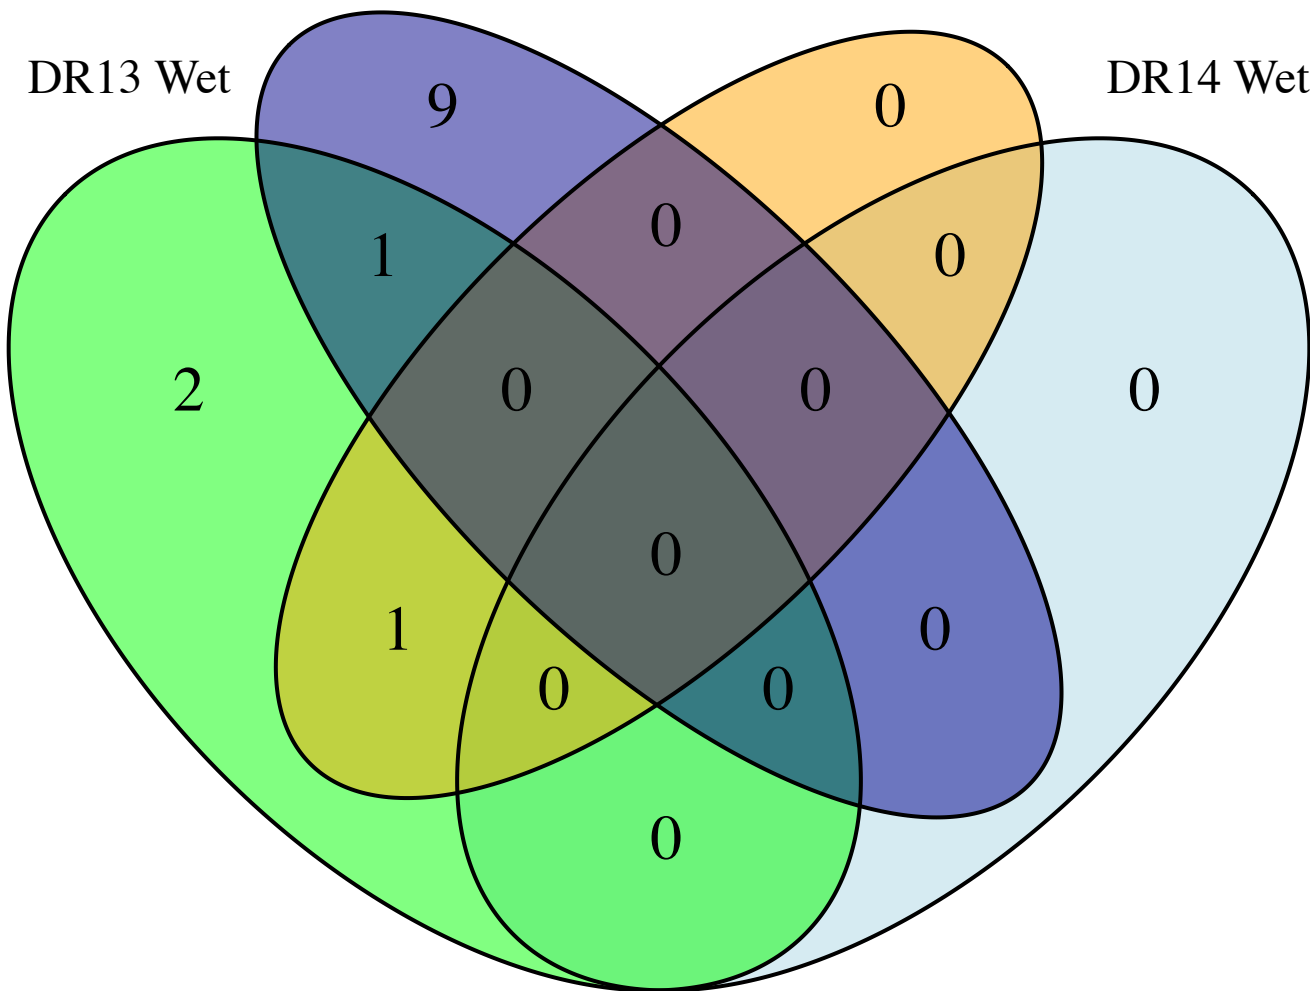

S7c\_Fig

BP14 Dry

DL13 Dry

DR13 Dry

DR14 Dry

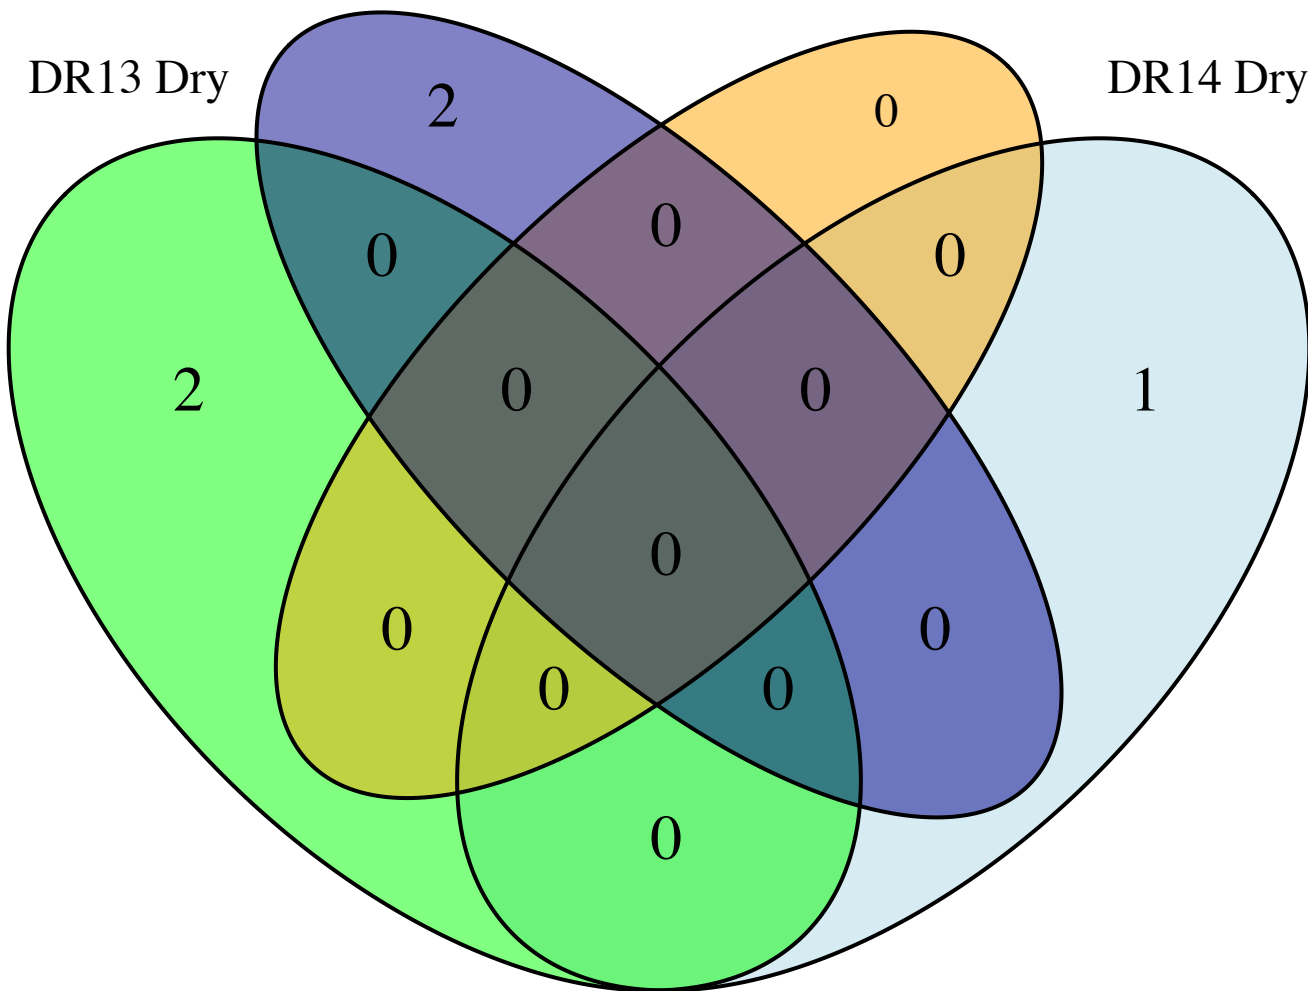

S7d\_Fig

2013 Sparse

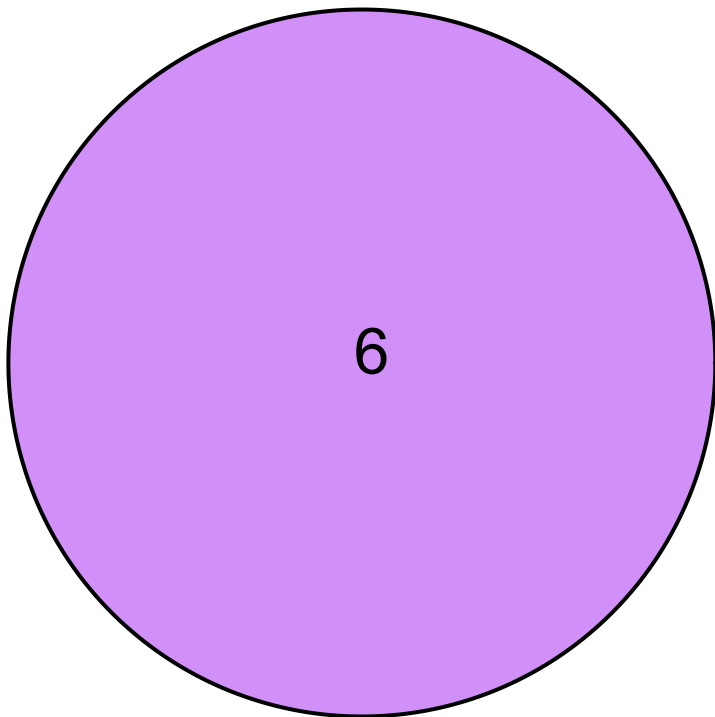

2014 Sparse

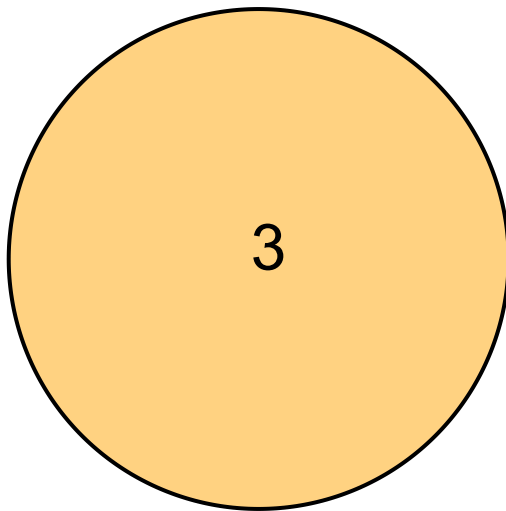

S7e\_Fig

2013 Dense

2014 Dense

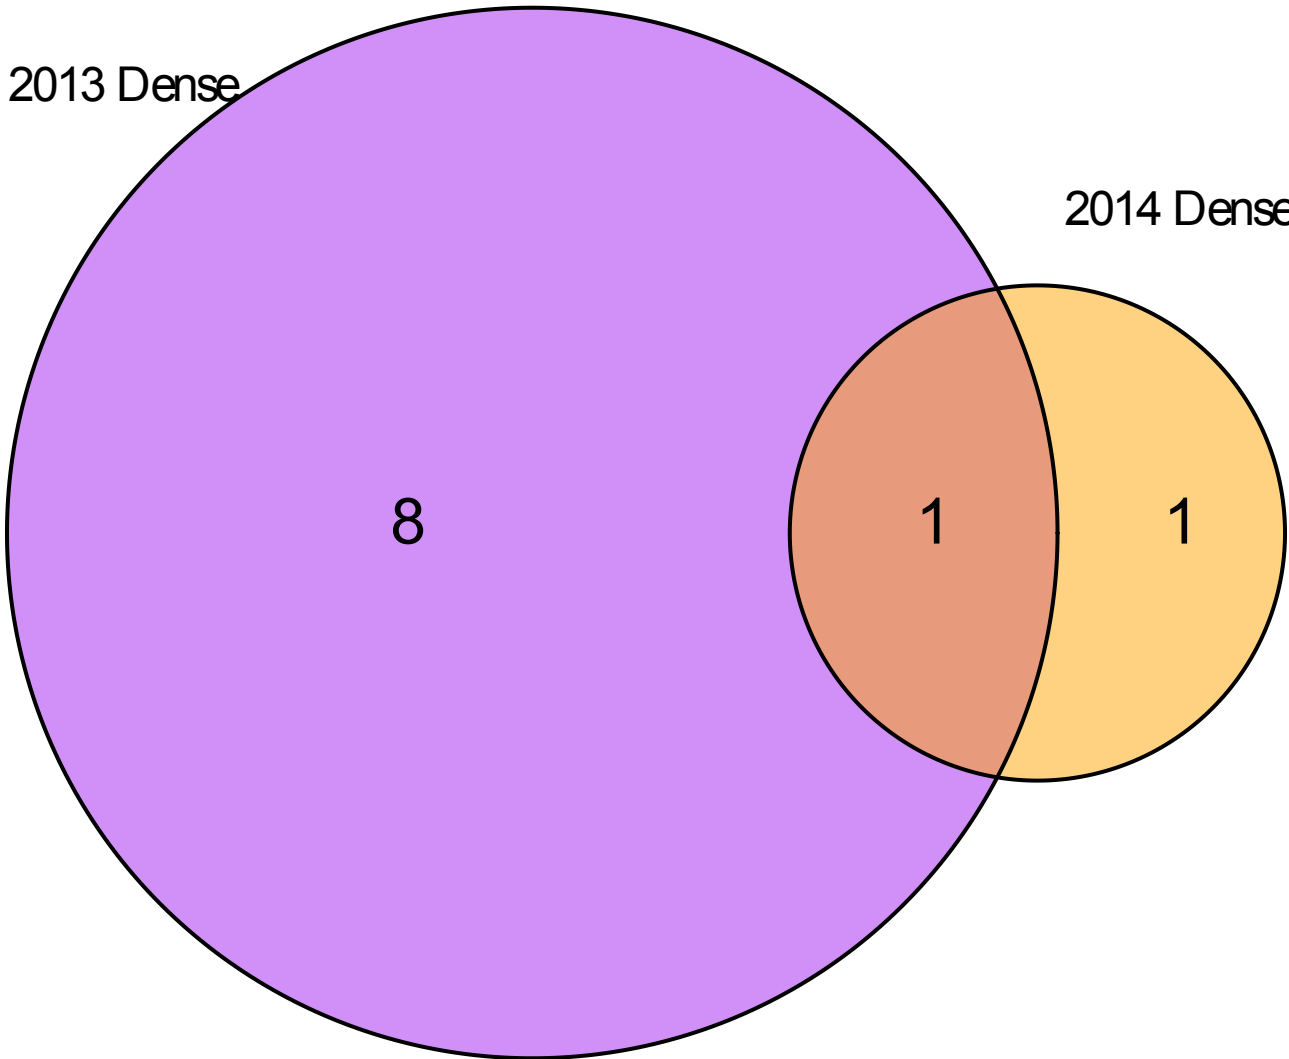

Supplement: pgen.1006841.s007.pdf [file pgen.1006841.s007.pdf]
