# Supplementary material for: Time dependent genetic analysis links field and controlled environment phenotypes in the model C4 grass Setaria
Source: PubMed Central journal article supplement (PMC5507400; doi:10.1371/journal.pgen.1006841), 2017-06-23

# DN13

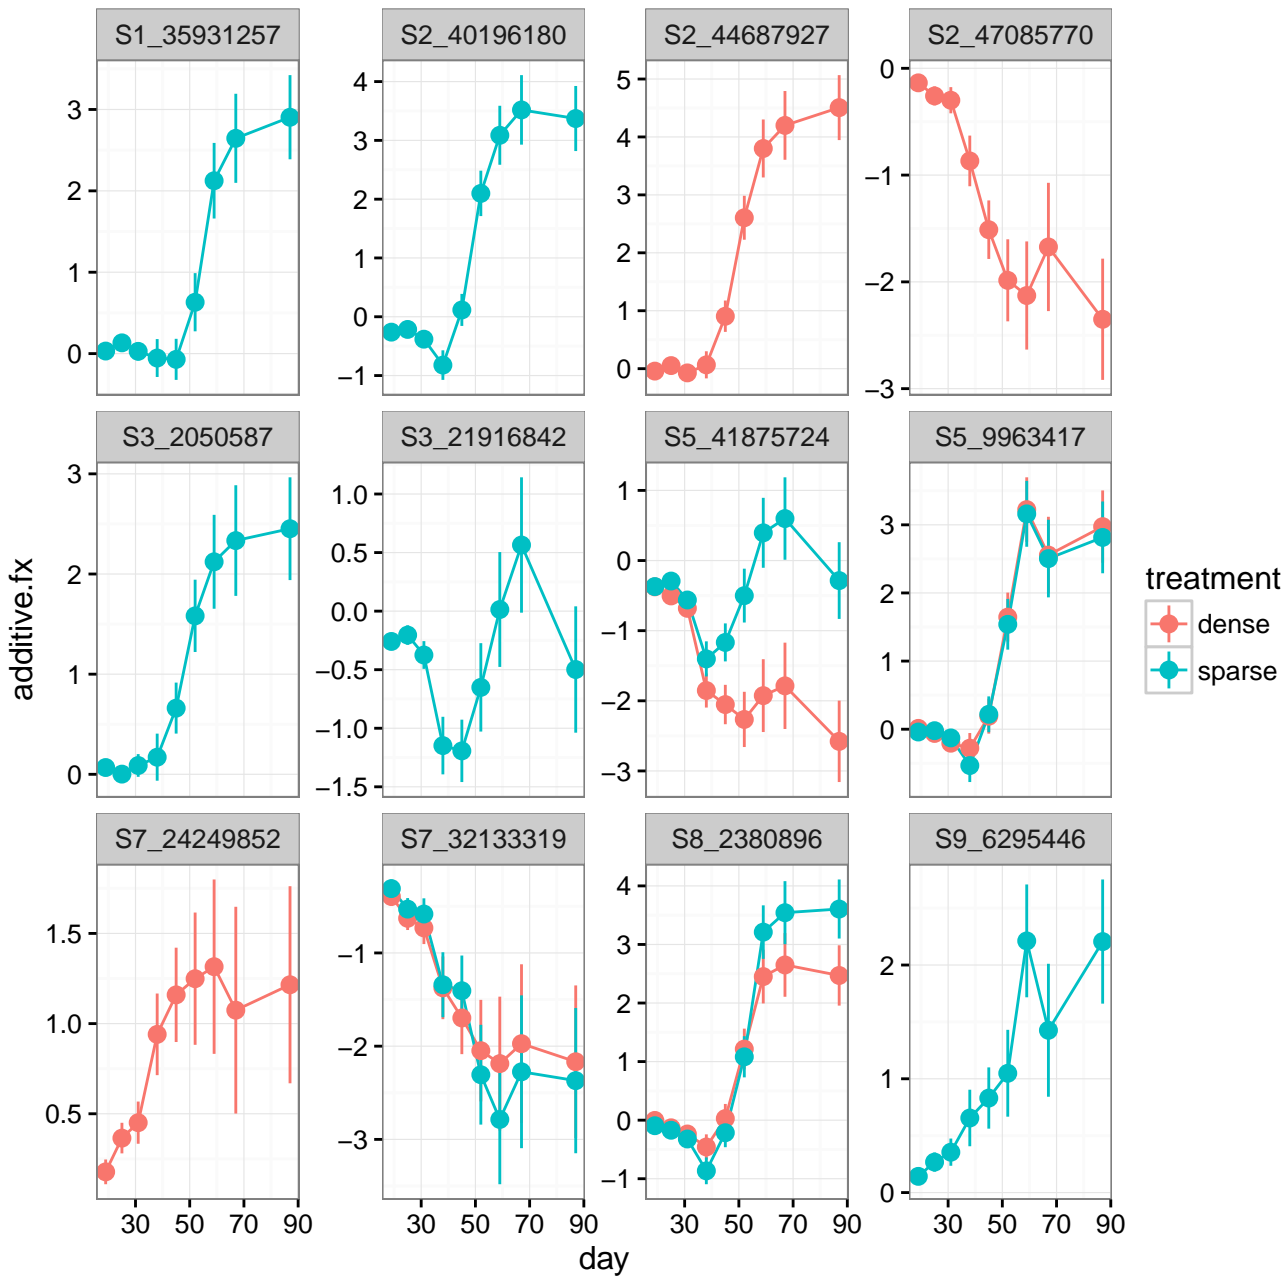

# DN14

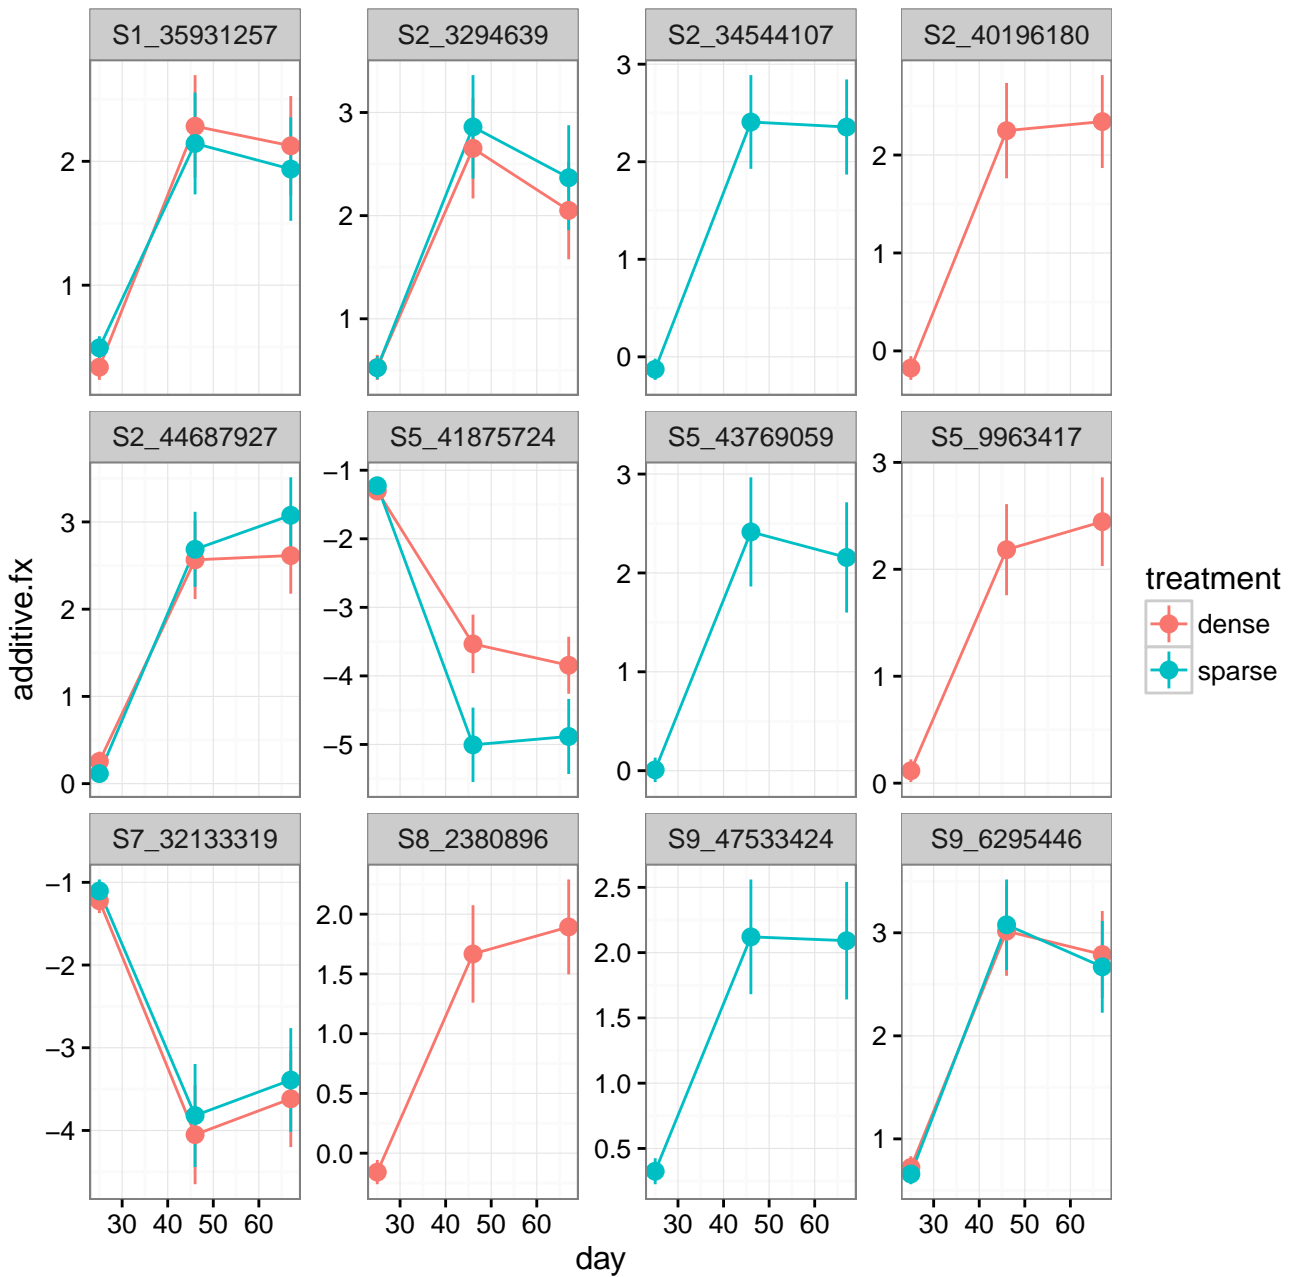

## DR13

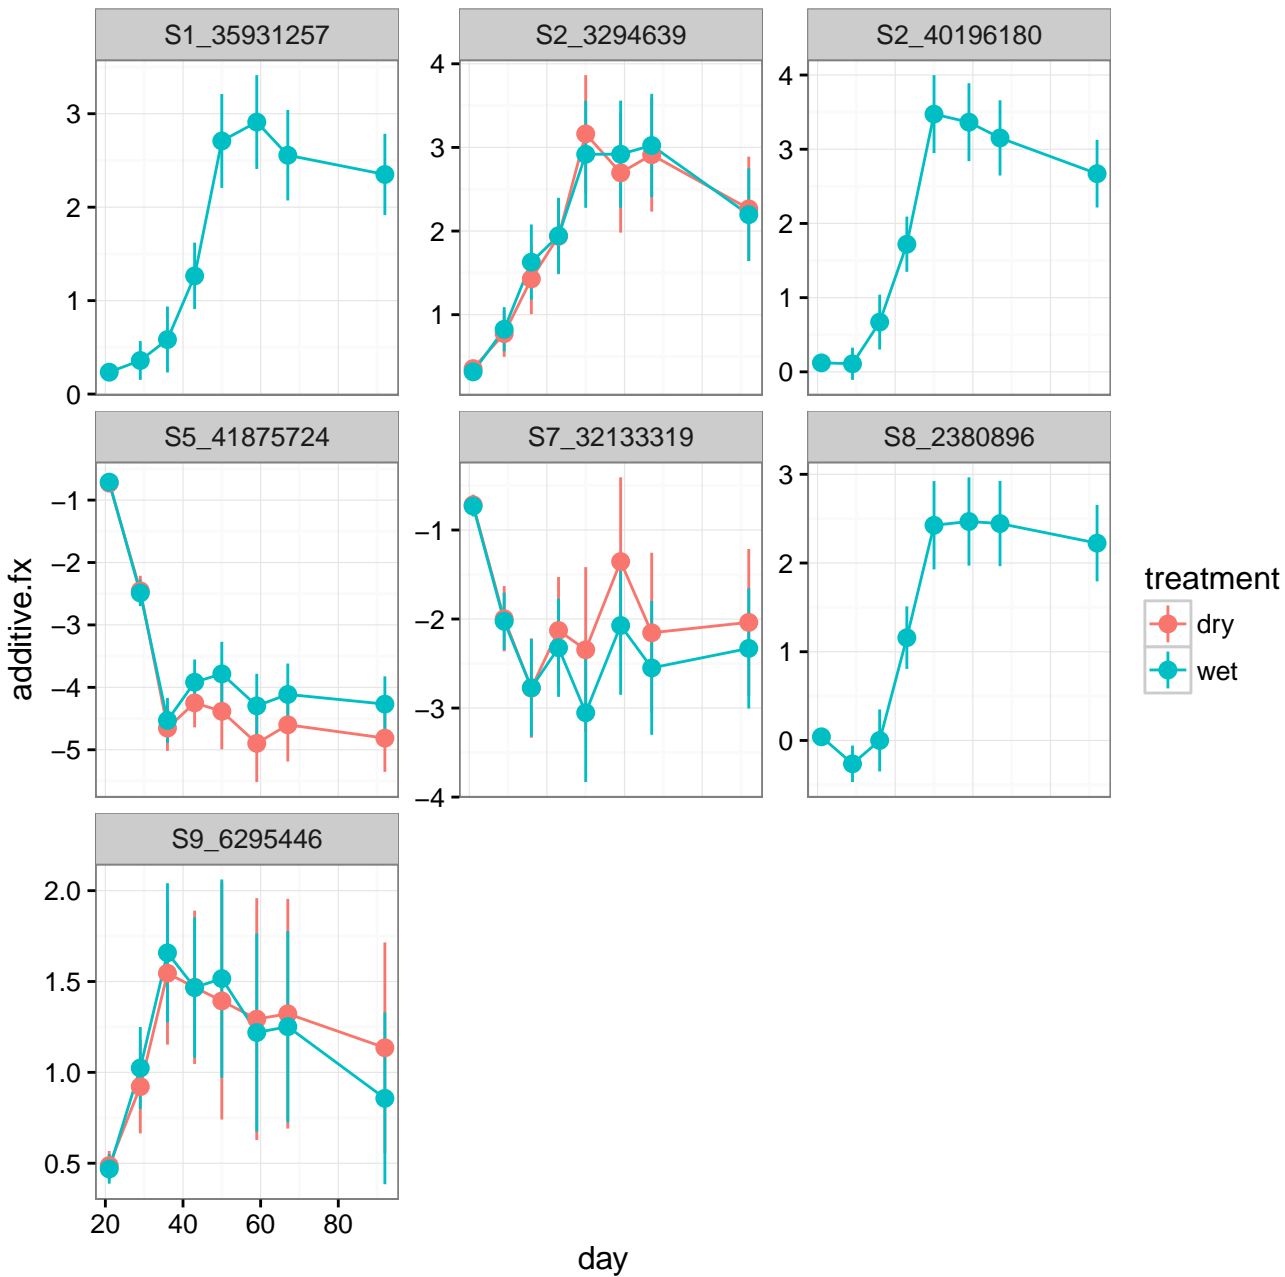

## BP14

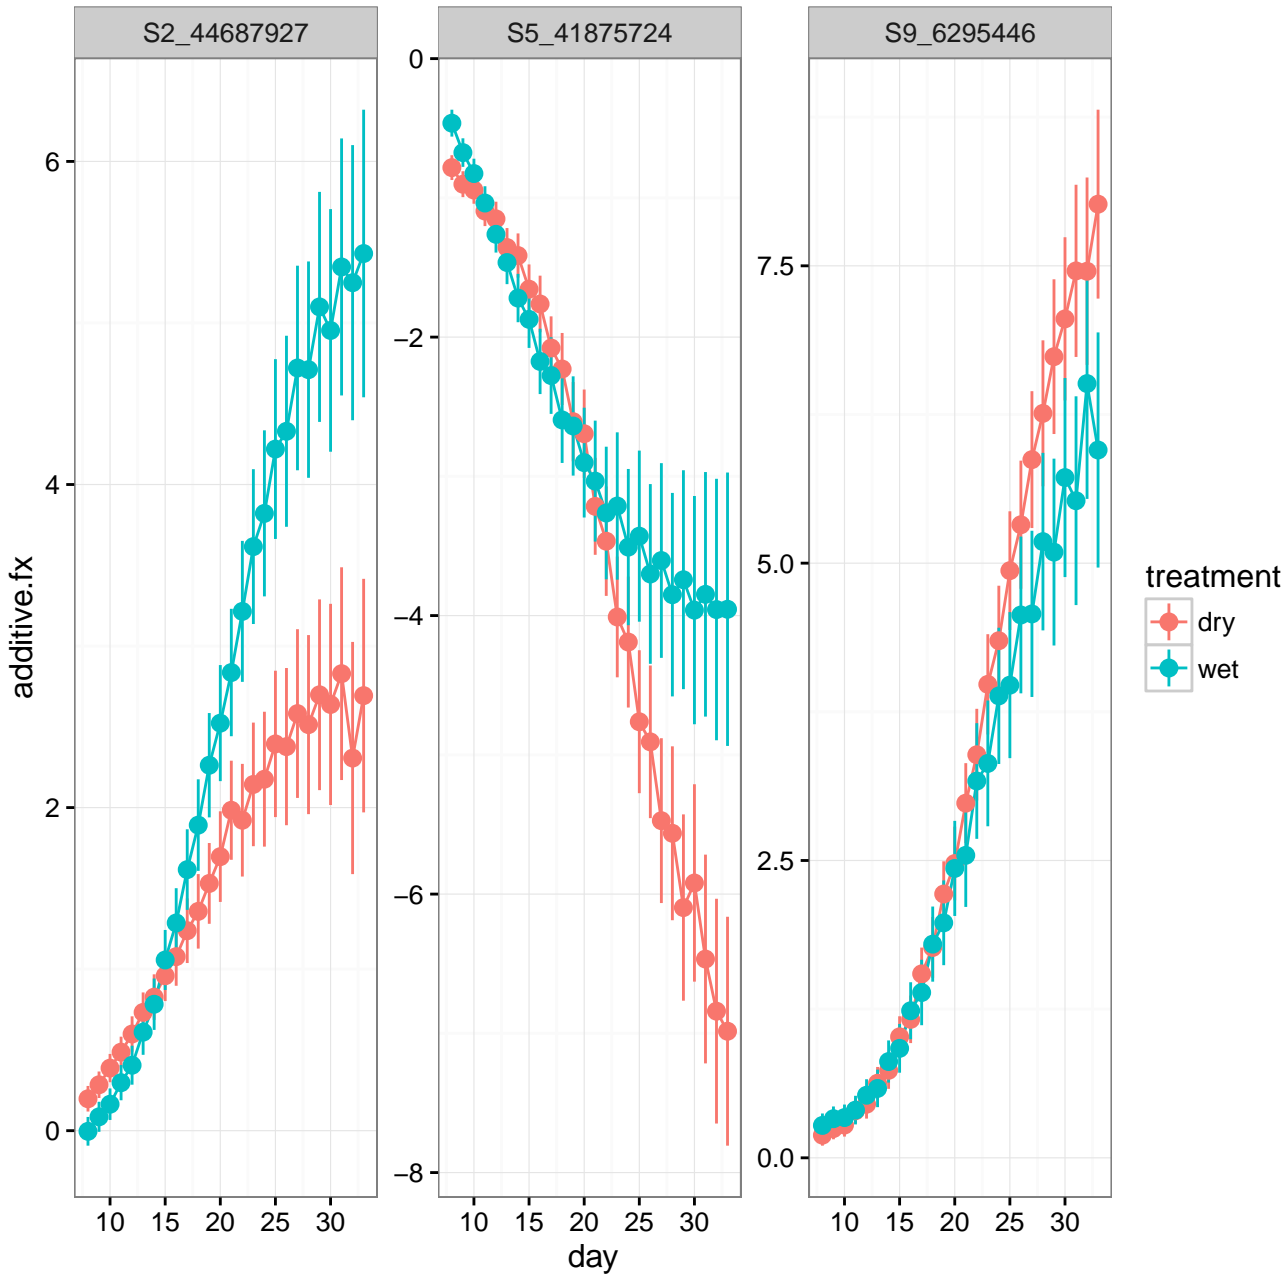

# DR14

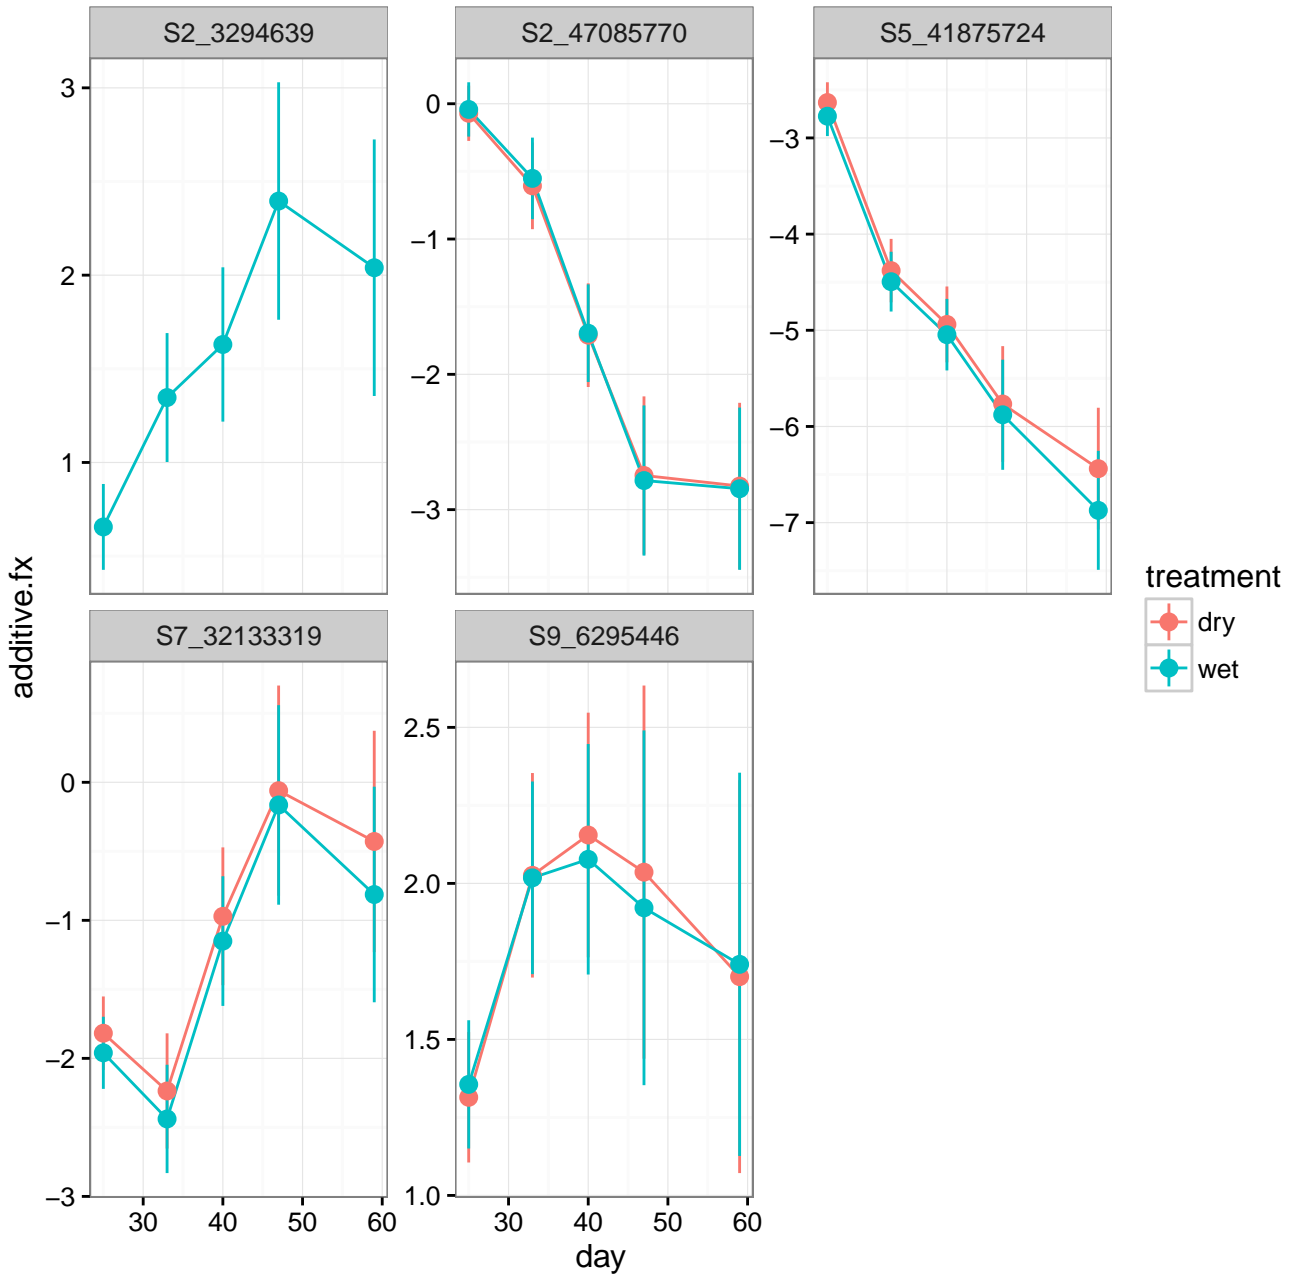

Supplement: pgen.1006841.s011.pdf [file pgen.1006841.s011.pdf]
