# Supplementary material for: Time dependent genetic analysis links field and controlled environment phenotypes in the model C4 grass Setaria
Source: PLoS Genet. 2017 Jun 23;13(6):e1006841. doi: 10.1371/journal.pgen.1006841 (PMC5507400; doi:10.1371/journal.pgen.1006841)
Supplement: S13 Table — (XLSX) [file pgen.1006841.s027.xlsx]

## Sheet: Sheet1
Plant	Locus	Chr	bin	pos	Gene model	CDS	Reference
Maize	D3	9	9.03	26712548	GRMZM2G093195	Zm00001d045563	18
Maize	Na1	3	3.06	178991745	GRMZM2G449033	Zm00001d042843	19
Maize	D1	3	3.03	10451980	GRMZM2G036340	Zm00001d039634	20
Maize	Py1	6	6.05	142567799	GRMZM2G039113	Zm00001d038060	21
Maize	Vp8	1	1.11	286319225	GRMZM2G010353	Zm00001d034383	22
Maize	Kn1	1	1.1	271340805	GRMZM2G017087	Zm00001d033859	23
Maize	D8	1	1.09	266933205	GRMZM2G144744	Zm00001d033680	24
Maize	Brd1	1	1.09	249311156	GRMZM2G103773	Zm00001d033180	25
Maize	An1	1	1.08	241218603	GRMZM2G081554	Zm00001d032961	26
Maize	Id1	1	1.08	239608944	GRMZM2G011357	Zm00001d032922	27
Maize	Br2	1	1.07	201422957	GRMZM2G315375	Zm00001d031871	28
Maize	Br1	1	1.06	202128502	GRMZM2G315375	Zm00001d031871	28
Maize	Dlf1	7	7.06	175538274	GRMZM2G067921	Zm00001d022613	29
Maize	Na2	5	5.03	65110874	GRMZM2G057000	Zm00001d014887	30
Maize	D9	5	5	11781976	GRMZM2G024973	Zm00001d013465	31
Maize	D5	2	2.02	10556361	GRMZM2G093603	Zm00001d002349	32
Sorghum	Dw1	9	NA	57038653	Sobic.009G229800	Sobic.009G229800	33
Sorghum	Dw3	7	NA	59821905	Sobic.007G163800	Sobic.007G163800	34
Rice	Dwarf1	3	NA	22536830	Os03g0602300	LOC_Os03g40540	35
Rice	Sd1	1	NA	38382385	Os01g0883800	LOC_Os01g66100	36
Setaria italica	SiDwarf2	3	NA	47170863	Si024731m.g	Seita.3G368400	15
